# Supplementary material
Source: PubMed Central journal article supplement (PMC3020722)
Supplement: supp_M110.157875_jbc.M110.157875-1.pdf [file supp_M110.157875_jbc.M110.157875-1.pdf]

Supplementary Figure 1.

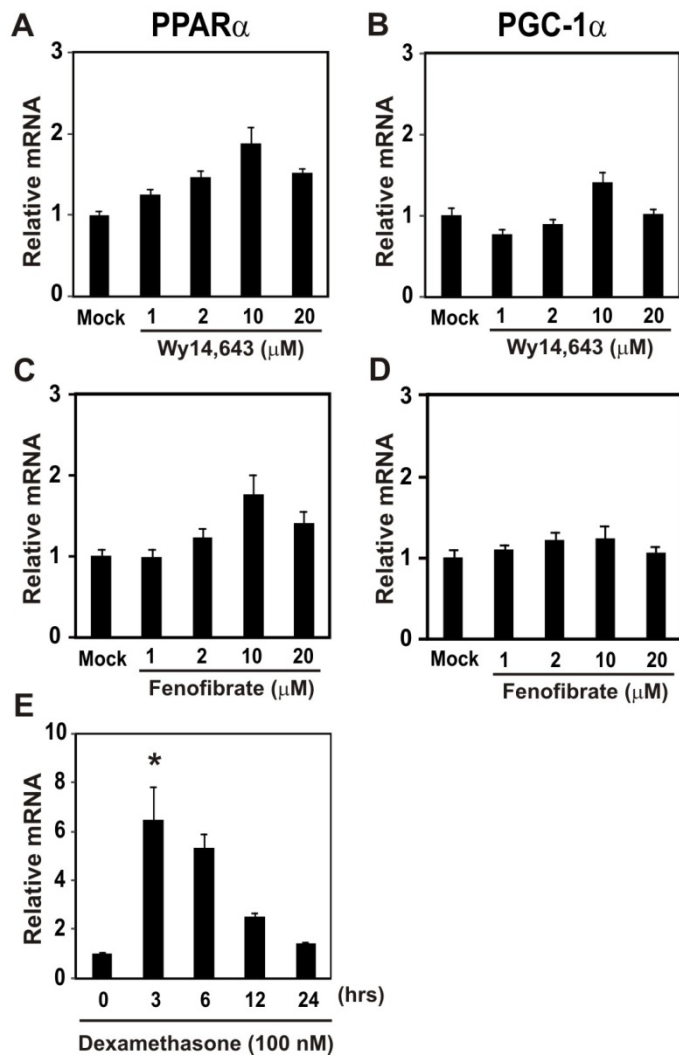

**Supplemental figure 1. Effects of PPAR $\alpha$  ligands on the mRNA levels of PPAR $\alpha$  and PGC-1 $\alpha$ .** Hepatocytes isolated from mice were treated with 1, 2, 10  $\mu$ M or 20  $\mu$ M Wy14,643 (A and B) or fenofibrate (C and D), respectively for 24 h. PPAR $\alpha$  (A and C) and PGC-1 $\alpha$  (B and D) mRNA levels were measured by qPCR. E, Effect of dexamethasone on the PPAR $\alpha$  mRNA levels was measured by qPCR as indicated. All the mRNA levels were normalized to Rplp0 mRNA levels.
