# Supplementary material
Source: PubMed Central journal article supplement (PMC3020722)
Supplement: supp_M110.157875_jbc.M110.157875-2.pdf [file supp_M110.157875_jbc.M110.157875-2.pdf]

Supplementary Figure 2.

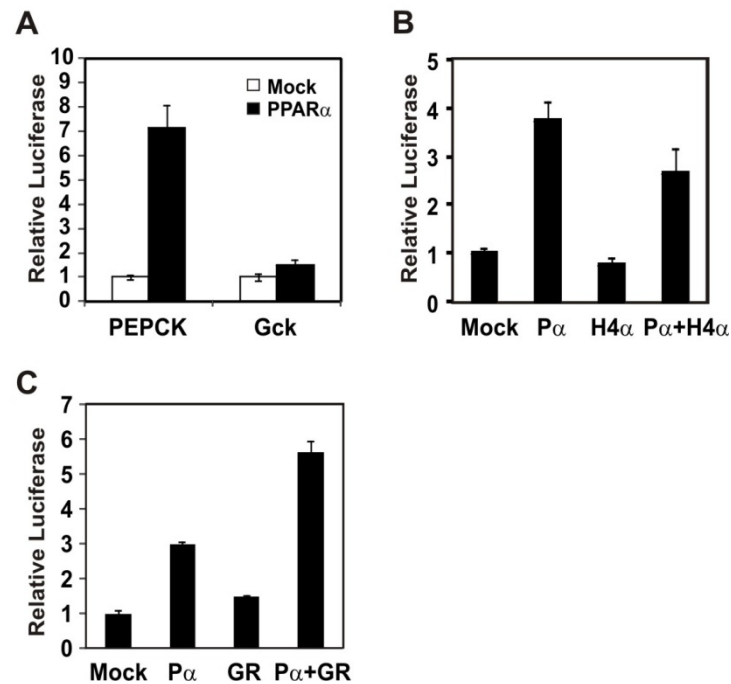

**Supplemental figure 2. Promoter activities of PEPCK, Gck and G6Pase.** A, Effect of PPAR $\alpha$  on the promoter activities of the PEPCK and glucokinase (Gck) genes. HepG2 cells were transiently co-transfected with firefly luciferase fusion genes containing the human PEPCK promoter (-599/-61 bp) or human Gck promoter (-1000/+158 bp), with PPAR $\alpha$  expression vector. After 24 h, the media were replaced with those containing Wy14,643 (20  $\mu$ M) and incubated for 24 h. Luciferase activities were normalized to Renilla activity. Results represent the means  $\pm$  S.E. of five experiments with triplicate samples. B, Effect of PPAR $\alpha$  or/and HNF-4 $\alpha$  on the promoter reporter activities of G6Pase gene in HepG2 cell. HepG2 cells were transiently co-transfected with firefly luciferase fusion genes containing the mouse G6Pase promoter (-1188/+66), with PPAR $\alpha$  expression vector or/and HNF-4 $\alpha$  and Wy14,643. C, Effect of PPAR $\alpha$  or/and GR on the promoter reporter activities of G6Pase gene in HepG2 cell. HepG2 cells were transiently co-transfected with firefly luciferase fusion genes containing the mouse G6Pase promoter (-1188/+66), with PPAR $\alpha$  expression vector or/and GR and Wy14,643 or/and dexamethasone.
